# Supplementary material
Source: PubMed Central journal article supplement (PMC3875162)
Supplement: NIHMS510475-supplement-1.pdf [file NIHMS510475-supplement-1.pdf]

Supplementary Table 1

Smoking trajectories regressed on ADHD Symptoms, rs13280604/rs892413, and their interaction terms among non-Hispanic White subsample

| <i>Model</i> | <i>Non-Use vs. Use</i> |           |             |           |             |           | <i>Number of Smoked</i> |           |             |           |             |           |
|--------------|------------------------|-----------|-------------|-----------|-------------|-----------|-------------------------|-----------|-------------|-----------|-------------|-----------|
|              | Intercept              |           | Slope       |           | Quad        |           | Intercept               |           | Slope       |           | Quad        |           |
|              | <i>Est.</i>            | <i>SE</i> | <i>Est.</i> | <i>SE</i> | <i>Est.</i> | <i>SE</i> | <i>Est.</i>             | <i>SE</i> | <i>Est.</i> | <i>SE</i> | <i>Est.</i> | <i>SE</i> |
| <b># 1</b>   |                        |           |             |           |             |           |                         |           |             |           |             |           |
| Intercept    | NA                     |           | -16.36*     | 7.16      | 7.65*       | 3.29      | -0.30                   | 1.08      | 0.35        | 2.64      | 0.04        | 1.42      |
| HI           | -0.20                  | 0.27      | 0.32        | 0.99      | -0.18       | 0.53      | -0.09                   | 0.08      | 0.48**      | 0.16      | -0.28**     | 0.08      |
| IN           | 0.15                   | 0.23      | -0.72       | 1.00      | 0.36        | 0.55      | 0.19*                   | 0.08      | -0.37**     | 0.14      | 0.21**      | 0.07      |
| AA           | -0.58                  | 0.76      | 2.12        | 1.24      | -1.10       | 0.66      | -0.53                   | 0.28      | 1.00        | 0.59      | -0.54       | 0.27      |
| AC           | -0.44                  | 1.78      | -2.86       | 4.91      | 1.38        | 2.18      | -0.12                   | 0.40      | 0.16        | 0.99      | -0.15       | 0.49      |
| <b># 2</b>   |                        |           |             |           |             |           |                         |           |             |           |             |           |
| Intercept    | NA                     |           | -17.50**    | 6.10      | 8.25**      | 2.88      | -0.36                   | 1.45      | 0.32        | 3.02      | 0.06        | 1.58      |
| AA * HI      | -2.71*                 | 1.30      | 11.32       | 7.14      | -12.19      | 6.95      | 0.02                    | 0.23      | -0.47       | 0.48      | 0.28        | 0.24      |
| AC * HI      | -2.31                  | 1.21      | 10.49       | 6.88      | -11.55      | 6.87      | -0.06                   | 0.21      | -0.25       | 0.45      | 0.15        | 0.22      |
| AA * IN      | 2.89                   | 1.48      | -26.95*     | 11.55     | 54.84       | 22.20     | -0.95***                | 0.25      | 1.40*       | 0.54      | -0.61**     | 0.23      |
| AC * IN      | 2.47                   | 1.45      | -25.85*     | 11.53     | 53.97       | 22.20     | -0.74**                 | 0.27      | 1.18*       | 0.54      | -0.50*      | 0.24      |
| <b># 3</b>   |                        |           |             |           |             |           |                         |           |             |           |             |           |
| Intercept    | NA                     |           | -19.79*     | 8.56      | 9.78*       | 4.24      | -0.66                   | 1.07      | 0.60        | 2.50      | 0.05        | 1.26      |
| HI           | -0.15                  | 0.21      | 0.28        | 0.72      | -0.16       | 0.39      | -0.11                   | 0.07      | 0.56**      | 0.16      | -0.32***    | 0.07      |
| IN           | 0.08                   | 0.16      | -0.46       | 0.69      | 0.20        | 0.40      | 0.21**                  | 0.06      | -0.34**     | 0.12      | 0.16**      | 0.06      |
| AA           | -0.43                  | 0.81      | 6.60        | 5.05      | -3.72       | 2.56      | -0.50*                  | 0.23      | 1.48*       | 0.63      | -0.91**     | 0.33      |
| AC           | -0.80                  | 0.89      | 7.23        | 4.66      | -3.77       | 2.35      | 0.13                    | 0.20      | 0.63        | 0.71      | -0.48       | 0.41      |
| <b># 4</b>   |                        |           |             |           |             |           |                         |           |             |           |             |           |
| Intercept    | NA                     |           | -14.29      | 14.07     | -29.09      | 23.57     | 0.75                    | 1.23      | 0.31        | 3.14      | 0.25        | 1.70      |
| AA * HI      | 1.55                   | 1.89      | -8.48       | 9.35      | 4.57        | 4.89      | 0.64*                   | 0.28      | -0.16       | 0.46      | 0.28        | 0.22      |
| AC * HI      | 3.02                   | 1.96      | -12.17      | 9.51      | 6.51        | 4.98      | 0.72*                   | 0.30      | -0.10       | 0.47      | 0.32        | 0.23      |
| AA * IN      | -1.51                  | 2.23      | 0.74        | 12.68     | 28.12       | 18.12     | -0.11                   | 0.34      | -0.08       | 0.55      | -0.06       | 0.22      |
| AC * IN      | -2.58                  | 2.34      | 3.88        | 12.90     | 26.27       | 18.24     | -0.27                   | 0.34      | 0.02        | 0.53      | -0.15       | 0.21      |

Note. Models 1 and 2 were results for SNP rs13280604 ( $n = 534$ ) whereas models 3 and 4 ( $n = 566$ ) were SNP rs892413. HI= Hyperactive-Impulsive symptoms. IN= Inattentive symptoms.\*  $p < .05$  \*\*  $p < .01$  \*\*\*  $p < .001$

Supplementary Table 2

*Post hoc* probing of interactions of rs13280604 variants at high and low levels of ADHD symptoms for non-Hispanic White subsample ( $n = 534$ )

| <b>Condition</b>      | <b><i>Non-Use vs. Use</i></b> |               |              |               |             |               | <b><i>Number of Smoked</i></b> |               |              |               |             |               |
|-----------------------|-------------------------------|---------------|--------------|---------------|-------------|---------------|--------------------------------|---------------|--------------|---------------|-------------|---------------|
|                       | <i>Intercept</i>              |               | <i>Slope</i> |               | <i>Quad</i> |               | <i>Intercept</i>               |               | <i>Slope</i> |               | <i>Quad</i> |               |
|                       | <i>b</i>                      | <i>95% CI</i> | <i>b</i>     | <i>95% CI</i> | <i>b</i>    | <i>95% CI</i> | <i>b</i>                       | <i>95% CI</i> | <i>b</i>     | <i>95% CI</i> | <i>b</i>    | <i>95% CI</i> |
| <b><i>HI-High</i></b> |                               |               |              |               |             |               |                                |               |              |               |             |               |
| Intercept             |                               | NA            | -18.43       | -38.39, 1.53  | 8.88        | -0.87, 18.64  | 0.42                           | -2.64, 3.47   | 0.85         | -6.00, 7.71   | -0.47       | -3.85, 2.92   |
| AA                    | -1.43                         | -5.70, 2.84   | 5.43         | -7.48, 18.34  | -2.97       | -9.12, 3.18   | -1.15                          | -2.69, 0.39   | 2.14         | -1.59, 5.87   | -0.89       | -2.59, 0.81   |
| AG                    | -0.65                         | -5.49, 4.19   | 3.26         | -8.43, 14.95  | -1.80       | -6.96, 3.36   | 0.29                           | -1.45, 2.02   | 1.19         | -2.58, 4.96   | -0.41       | -2.18, 1.37   |
| <b><i>HI-Low</i></b>  |                               |               |              |               |             |               |                                |               |              |               |             |               |
| Intercept             |                               | NA            | -24.78**     | -40.89, -8.67 | 11.45**     | 3.14, 19.77   | -0.57                          | -2.84, 1.69   | -0.10        | -5.31, 5.10   | 0.44        | -2.29, 3.16   |
| AA                    | -0.08                         | -2.68, 2.52   | 8.80         | -2.29, 19.89  | -4.09       | -11.01, 2.84  | -0.37                          | -0.97, 0.23   | 0.34         | -1.02, 1.71   | -0.32       | -1.03, 0.39   |
| AG                    | 0.18                          | -2.77, 3.13   | 7.29         | -2.79, 17.36  | -3.25       | -9.20, 2.69   | -0.02                          | -0.99, 0.95   | -0.47        | -2.72, 1.77   | 0.18        | -1.04, 1.39   |
| <b><i>IN-High</i></b> |                               |               |              |               |             |               |                                |               |              |               |             |               |
| Intercept             |                               | NA            | -24.54**     | -41.30, -7.78 | 10.87*      | 2.49, 19.25   | 2.55*                          | 0.11, 4.99    | -2.41        | -8.09, 3.27   | 1.18        | -1.58, 3.94   |
| AA                    | -1.94                         | -4.49, 0.62   | 8.11         | -2.89, 19.10  | -3.08       | -9.22, 3.06   | -2.58*                         | -4.05, -1.12  | 3.49*        | 0.45, 6.53    | -1.52*      | -2.79, -0.25  |
| AG                    | -1.58                         | -4.93, 1.78   | 7.02         | -3.48, 17.52  | -2.72       | -8.41, 2.98   | -1.19                          | -2.46, 0.07   | 2.45         | -0.40, 5.31   | -0.97       | -2.29, 0.35   |
| <b><i>IN-Low</i></b>  |                               |               |              |               |             |               |                                |               |              |               |             |               |
| Intercept             |                               | NA            | -14.32       | -30.45, 1.80  | 7.23        | -0.44, 14.90  | -1.48                          | -4.82, 1.87   | 2.45         | -5.07, 9.97   | -0.95       | -5.10, 3.19   |
| AA                    | 1.71                          | -0.57, 3.99   | 1.78         | -8.27, 11.83  | -1.60       | -6.72, 3.53   | 0.83                           | -0.04, 1.70   | -0.62        | -2.38, 1.15   | 0.18        | -0.66, 1.02   |
| AG                    | 2.84                          | -0.66, 6.34   | -1.64        | -13.29, 10.01 | 0.42        | -5.14, 5.98   | 1.47*                          | 0.04, 2.90    | -1.52        | -4.04, 1.01   | 0.68        | -0.49, 1.86   |

\*  $p < .05$  \*\*  $p < .01$  \*\*\*  $p < .001$ .
